# Supplementary material for: Effect of a hospital command centre on patient safety: an interrupted time series study
Source: HighWire-hosted journal article supplement (doi:10.1136/bmjhci-2022-100653), 2023-01-01
Supplement: bmjhci-2022-100653supp001_data_supplement.pdf [file bmjhci-2022-100653supp001_data_supplement.pdf]

**Supplementary Table 1: summary results for five phase models**

| Outcome                           | Trend (trend and SE) in BRI                   | Trend (trend and SE) in CHH                   |
|-----------------------------------|-----------------------------------------------|-----------------------------------------------|
| Mortality (%) †                   | Patient flow program= 0.01(0.01)              | Patient flow program= 0.02(0.01)              |
|                                   | Command centre display roll-in = 0.01(0.01)   | Command centre display roll-in = 0.02(0.02)   |
|                                   | Command centre activation= <b>-0.01(0.00)</b> | Command centre activation= <b>-0.01(0.01)</b> |
|                                   | Engagement resumption= 0.01(0.03)             | Engagement resumption= 0.00(0.06)             |
| Readmissions within 72 hours (%)‡ | Patient flow program= 0.01(0.01)              | Patient flow program= 0.05(0.02)              |
|                                   | Command centre display roll-in = -0.00(0.02)  | Command centre display roll-in = 0.04(0.02)   |
|                                   | Command centre activation= 0.01(0.01)         | Command centre activation= -0.02(0.01)        |
|                                   | Engagement resumption= -0.06(0.05)            | Engagement resumption= 0.01(0.04)             |
| Post-operative sepsis (%)         | Patient flow program= 0.01(0.02)              | -                                             |
|                                   | Command centre display roll-in = 0.00(0.03)   | -                                             |
|                                   | Command centre activation= -0.02(0.01)        | -                                             |
|                                   | Engagement resumption= <b>1.17(0.52)</b>      | -                                             |

Note: \*, reference is the pre-intervention period; <sup>a</sup>; models were adjusted for baseline trend, covid-19 pandemic (pre- and post-pandemic) and covid-19 spikes †, inpatient emergency admissions; ‡, accident and emergency visits.

**Supplementary Table 2: Summary results for three-phase models**

| Outcome                           | Intervention phase             | Effect change (95% CI) |
|-----------------------------------|--------------------------------|------------------------|
| Mortality (%)†                    | Pre-intervention               | Ref.                   |
|                                   | Command centre tile roll-in    | -0.50(-1.3 to 0.27)    |
|                                   | Command centre activation      | -0.32(-1.0 to 0.39)    |
| Readmissions within 72 hours (%)† | Pre-intervention               | Ref.                   |
|                                   | Command centre display roll-in | -0.17(-1.5 to 1.2)     |
|                                   | Command centre activation      | 0.36(-0.9 to 1.6)      |
| Post-operative sepsis (%)         | Pre-intervention               | Ref.                   |
|                                   | Command centre display roll-in | -0.58(-2.7 to 1.5)     |
|                                   | Command centre activation      | 1.17(-0.8 to 3.1)      |

Note: \*, models were adjusted for trend, COVID-19 pandemic (pre- and post-pandemic) and COVID-19 spikes; †, inpatient emergency admissions of BRI hospital; ‡, accident and emergency visits of BRI hospital.
